# Supplementary material
Source: ML conference proceedings conference paper supplement (https://proceedings.neurips.cc/paper_files/paper/2022/hash/df4f371f1f89ec8ba5014b3310578048-Abstract.html)
Supplement: Supplementary file 1 [file df4f371f1f89ec8ba5014b3310578048-Supplemental-Conference.pdf]

## A Model Hyperparameters

Table 1 presents the model hyperparameters of X-MOE. The gating temperature  $\tau_0$  is initialized as 0.3 and 0.07 for the softmax gating and sigmoid gating, respectively. We use the same vocabulary as XLM-R (Conneau et al., 2020) with 250K subwords tokenized by SentencePiece (Kudo and Richardson, 2018).

Table 1: Model hyperparameters of X-MOE.

| Hyperparameters                         | Value      |
|-----------------------------------------|------------|
| FFNs in X-MOE layer                     | 3          |
| Number of experts                       | 32         |
| Expert embedding dimension              | 16         |
| Initialized gating temperature $\tau_0$ | 0.3 / 0.07 |
| Transformer blocks                      | 12         |
| Hidden size                             | 768        |
| FFN inner hidden size                   | 3,072      |
| Attention heads                         | 12         |

## B Hyperparameters for Pre-training

Table 2 presents the hyperparameters for pre-training.

Table 2: Hyperparameters for pre-training.

| Hyperparameters            | Value        |
|----------------------------|--------------|
| Optimizer                  | Adam         |
| Training steps             | 125,000      |
| Batch tokens per task      | 1M           |
| Adam $\epsilon$            | 1e-6         |
| Adam $\beta$               | (0.9, 0.98)  |
| Maximum learning rate      | 5e-4         |
| Learning rate schedule     | Linear decay |
| Warmup steps               | 10,000       |
| Weight decay               | 0.01         |
| Transformer dropout        | 0.1          |
| X-MOE dropout              | 0            |
| Load balancing coefficient | 1e-2         |

## C Hyperparameters for Fine-tuning

Table 3 presents the hyperparameters for fine-tuning.

Table 3: Hyperparameters for fine-tuning on the XTREME downstream tasks.

| Hyperparameters | POS            | NER            | XQuAD          | MLQA           | TyDiQA         | XNLI           | PAWS-X         |
|-----------------|----------------|----------------|----------------|----------------|----------------|----------------|----------------|
| Batch size      | 8              | 8              | 32             | 32             | 32             | 32             | 32             |
| Learning rate   | {1,2,3}e-5     | {5,...,9}e-6   | {2,3,4}e-5     | {2,3,4}e-5     | {2,3,4}e-5     | 2e-5           | {1,2}e-5       |
| LR schedule     | Linear decay   |
| Warmup          | 10%            | 10%            | 10%            | 10%            | 10%            | 20%            | 10%            |
| Weight decay    | 0              | 0              | 0              | 0              | 0              | 1e-2           | 0              |
| Epochs          | 10             | 10             | {2,3,4}        | {2,3,4}        | {10,20,40}     | 5              | 10             |
| Load balancing  | 0,1e{-3,-2,-1} |

## References

Alexis Conneau, Kartikay Khandelwal, Naman Goyal, Vishrav Chaudhary, Guillaume Wenzek, Francisco Guzmán, Edouard Grave, Myle Ott, Luke Zettlemoyer, and Veselin Stoyanov. Un-supervised cross-lingual representation learning at scale. In *Proceedings of the 58th Annual*

*Meeting of the Association for Computational Linguistics, ACL 2020*, pages 8440–8451. Association for Computational Linguistics, 2020. doi: 10.18653/v1/2020.acl-main.747. URL <https://doi.org/10.18653/v1/2020.acl-main.747>.

Taku Kudo and John Richardson. SentencePiece: A simple and language independent subword tokenizer and detokenizer for neural text processing. In *Proceedings of the 2018 Conference on Empirical Methods in Natural Language Processing: System Demonstrations*, pages 66–71, Brussels, Belgium, November 2018. Association for Computational Linguistics. doi: 10.18653/v1/D18-2012. URL <https://www.aclweb.org/anthology/D18-2012>.
